# Supplementary material for: Safety of Cyclooxygenase-2 Inhibitors in Osteoarthritis: Outcomes of a Systematic Review and Meta-Analysis
Source: PubMed Central journal article supplement — Drugs Aging. 2019 May 9;36(Suppl 1):25–44. doi: 10.1007/s40266-019-00664-x (PMC6509094; doi:10.1007/s40266-019-00664-x), 2019-05-09
Supplement: 40266_2019_664_MOESM1_ESM.pdf [file 40266_2019_664_MOESM1_ESM.pdf]

**Drugs and Aging, 2019**

**Supplement: Safety of Anti-Osteoarthritis Medications**

**Safety of cyclooxygenase-2 inhibitors in osteoarthritis: Outcomes of a systematic review and meta-analysis**

Elizabeth Curtis, Nicholas Fuggle, Sarah Shaw, Laura Spooner, Georgia Ntani, Camille Parsons, Nadia Corp, Germain Honvo, Janis Baird, Stefania Maggi, Elaine Dennison, Olivier Bruyère, Jean-Yves Reginster, Cyrus Cooper

**ELECTRONIC SUPPLEMENTARY MATERIAL 1**

## Search strategies

**Databases:** Ovid MEDLINE(R) Epub Ahead of Print, In-Process & Other Non-Indexed Citations, Ovid MEDLINE(R) Daily and Ovid MEDLINE(R) <1946 to Present>

& Cochrane Central Register of Controlled Trials, via Ovid (Ovid CENTRAL)

1. exp Osteoarthritis/
2. (degenerative adj (arthritis OR joint\*1 OR arthritides)).ti,ab,kw.
3. (osteoarthr\* OR arthros\* OR coxarthros\* OR gonarthros\* OR joint failure\*1 OR osteoarthritis OR OA).ti,ab,kw.
4. 1 OR 2 OR 3
5. exp Cyclooxygenase 2 Inhibitors/
6. ((cyclooxygenase-2 OR "cyclooxygenase 2" OR cyclooxygenase-II OR cyclooxygenaseII OR "cyclo oxygenase-2" OR "cyclo oxygenase2" OR "cyclo oxygenase-II" OR "cyclo oxygenaseII" OR cox-2 OR cox2 OR "cox 2" OR cox-II OR coxII OR "cox II") adj1 inhibit\*).ti,ab,kw.
7. Coxib\*1.ti,ab,kw.
8. (Celecoxib OR Lumiracoxib OR Rofecoxib OR Valdecoxib OR Parecoxib OR Etoricoxib OR Etodolac OR Meloxicam OR Nimesulide OR Firocoxib OR Nabumetone).ti,ab,kw.
9. ("Etodolic Acid" OR miloxicam OR nabumeton OR SC-58635 OR COX-189 OR MK-966 OR MK-0966 OR SC-65872 OR MK-0663 OR SC-65872 OR MK-0663 OR L-791456 OR AY- 24236 OR R-805 OR ML-1785713 OR BRL-14777 OR Celebrex OR Vioxx OR Movalis).ti,ab,kw.
10. 5 OR 6 OR 7 OR 8 OR 9
11. Randomized controlled trial.pt.
12. Controlled clinical trial.pt.
13. Randomized Controlled Trials as Topic/
14. Controlled Clinical Trials as Topic/
15. ("Randomized controlled trial\*" OR "Randomized clinical trial\*" OR "Controlled clinical trial\*" OR Placebo-controlled OR Sham-controlled OR Saline-controlled OR Vehicle- controlled OR "Randomized double-blind" OR Random\* OR Placebo OR RCT).ti,ab,kw.
16. 11 OR 12 OR 13 OR 14 OR 15
17. 4 AND 10 AND 16

**Database:** SCOPUS Search Strategy

((TITLE-ABS-KEY (osteoarthr\* OR arthrosis OR coxarthros\* OR gonarthros\* OR "joint failure\*" OR osteo-arthritis OR OA)

)

OR (

TITLE-ABS-KEY (degenerative W/O (arthritis OR joint\* OR arthritides))

))

AND

((TITLE-ABS-KEY (Coxib\* OR "cyclooxygenase-2 inhibit\*" OR "cyclooxygenase-II inhibit\*" OR "cyclooxygenaseII inhibit\*" OR "cyclo oxygenase-2 inhibit\*" OR "cyclo oxygenase2 inhibit\*" OR "cyclo oxygenase-II inhibit\*" OR "cyclo oxygenaseII inhibit\*" OR "cox-2 inhibit\*" OR "cox2 inhibit\*" OR "cox-II inhibit\*" OR "coxII inhibit\*"))

)

OR (

TITLE-ABS-KEY (Celecoxib OR Lumiracoxib OR Rofecoxib OR Valdecoxib OR Parecoxib OR Etoricoxib OR Etodolac OR Meloxicam OR Nimesulide OR Firocoxib OR Nabumetone)

)

OR (

TITLE-ABS-KEY ({Etodolic Acid} OR miloxicam OR nabumeton OR SC-58635 OR COX-189 OR MK- 966 OR MK-0966 OR SC-65872 OR MK-0663 OR SC-65872 OR MK-0663 OR L-791456 OR AY-

24236 OR R-805 OR ML-1785713 OR BRL-14777 OR Celebrex OR Vioxx OR Movalis)

))

AND

(TITLE-ABS-KEY ("Randomized controlled trial\*" OR "Randomized clinical trial\*" OR "Controlled clinical trial\*" OR Placebo-controlled OR Sham-controlled OR Saline-controlled OR Vehicle-controlled OR "Randomized double-blind" OR Random\* OR Placebo OR RCT)

)) AND

(LIMIT-TO ( DOCTYPE,"ar ") OR LIMIT-TO ( DOCTYPE,"ip "))
