# Supplementary material for: Safety of Cyclooxygenase-2 Inhibitors in Osteoarthritis: Outcomes of a Systematic Review and Meta-Analysis
Source: PubMed Central journal article supplement — Drugs Aging. 2019 May 9;36(Suppl 1):25–44. doi: 10.1007/s40266-019-00664-x (PMC6509094; doi:10.1007/s40266-019-00664-x), 2019-05-09
Supplement: 40266_2019_664_MOESM2_ESM.pdf [file 40266_2019_664_MOESM2_ESM.pdf]

Drugs and Aging, 2019

Supplement: Safety of Anti-Osteoarthritis Medications

Safety of cyclooxygenase-2 inhibitors in osteoarthritis: Outcomes of a systematic review  
and meta-analysis

Elizabeth Curtis, Nicholas Fuggle, Sarah Shaw, Laura Spooner, Georgia Ntani, Camille  
Parsons, Nadia Corp, Germain Honvo, Janis Baird, Stefania Maggi, Elaine Dennison,  
Olivier Bruyère, Jean-Yves Reginster, Cyrus Cooper

**ELECTRONIC SUPPLEMENTARY MATERIAL 2**

**Figure 9** Relative risk (RR) of lower gastrointestinal (GI) adverse events for COX-2 inhibitors versus placebo

# Cox-2 inhibitors vs Placebo

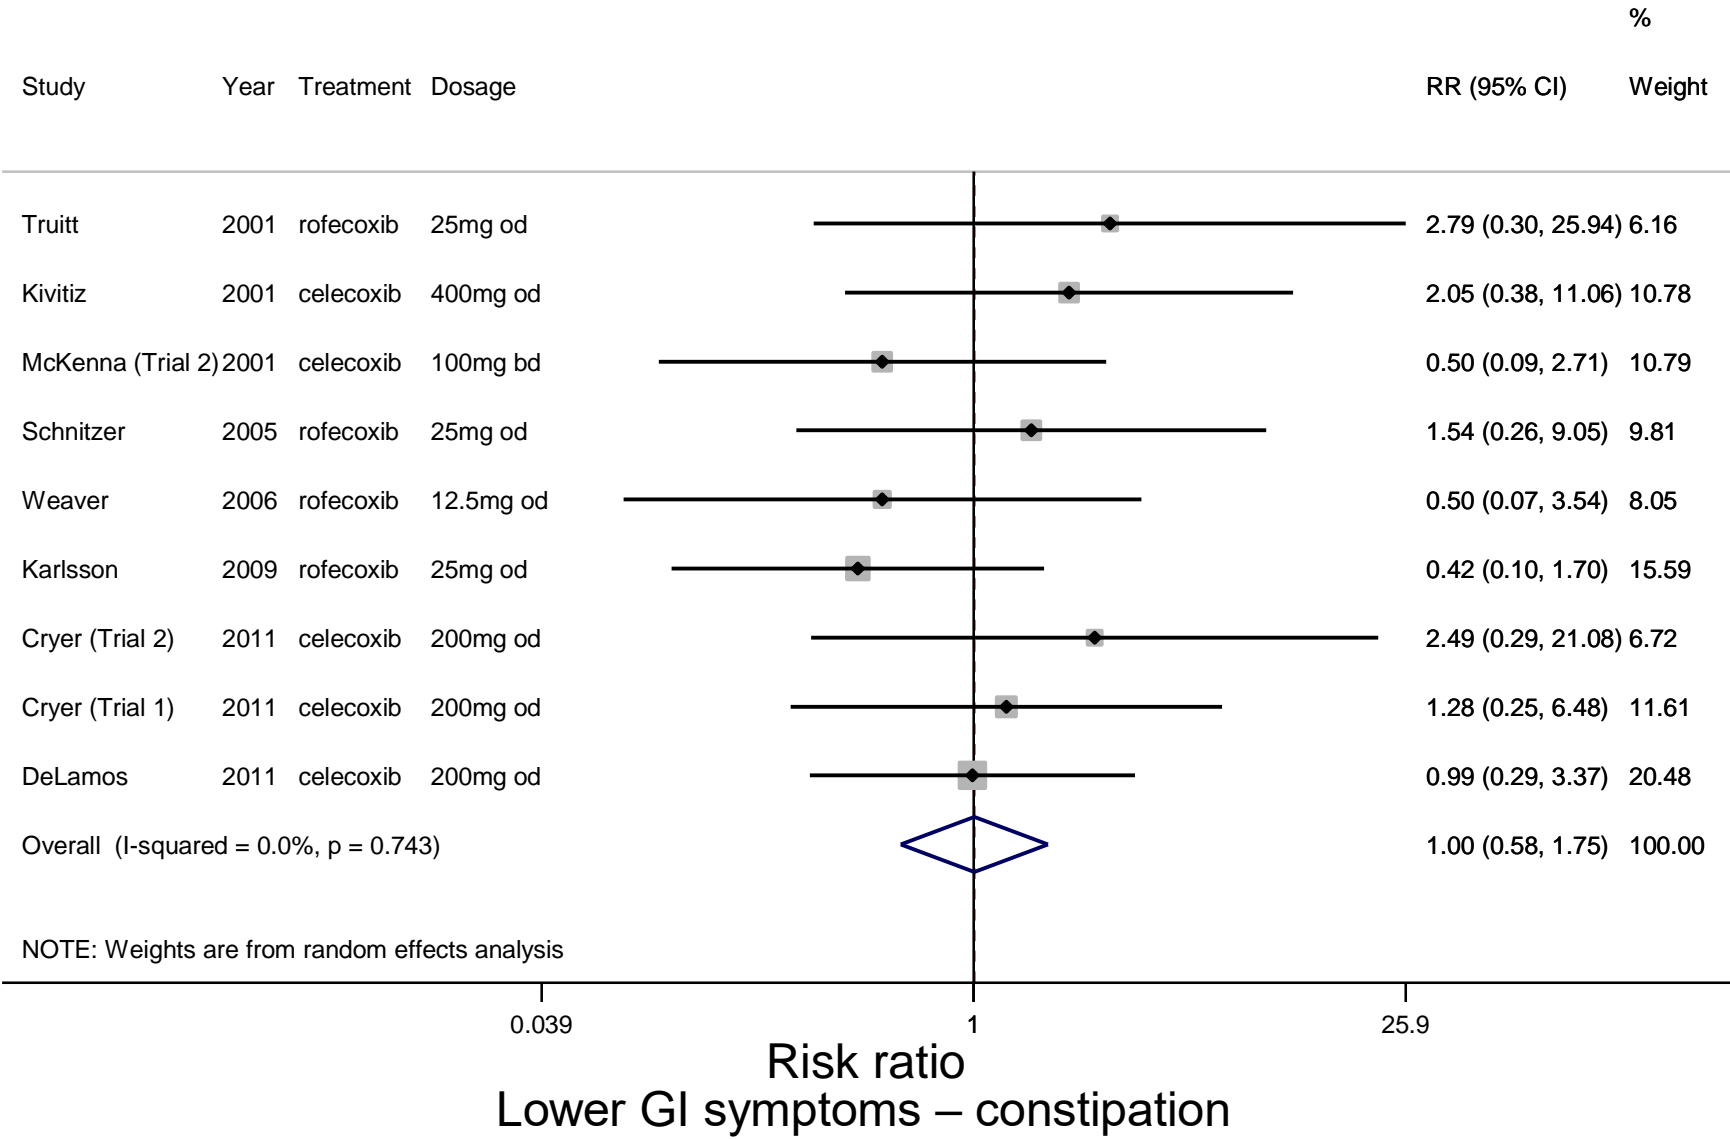

**Figure 10** Relative risk (RR) of nausea/vomiting for COX-2 inhibitors versus placebo

# Cox-2 inhibitors vs Placebo

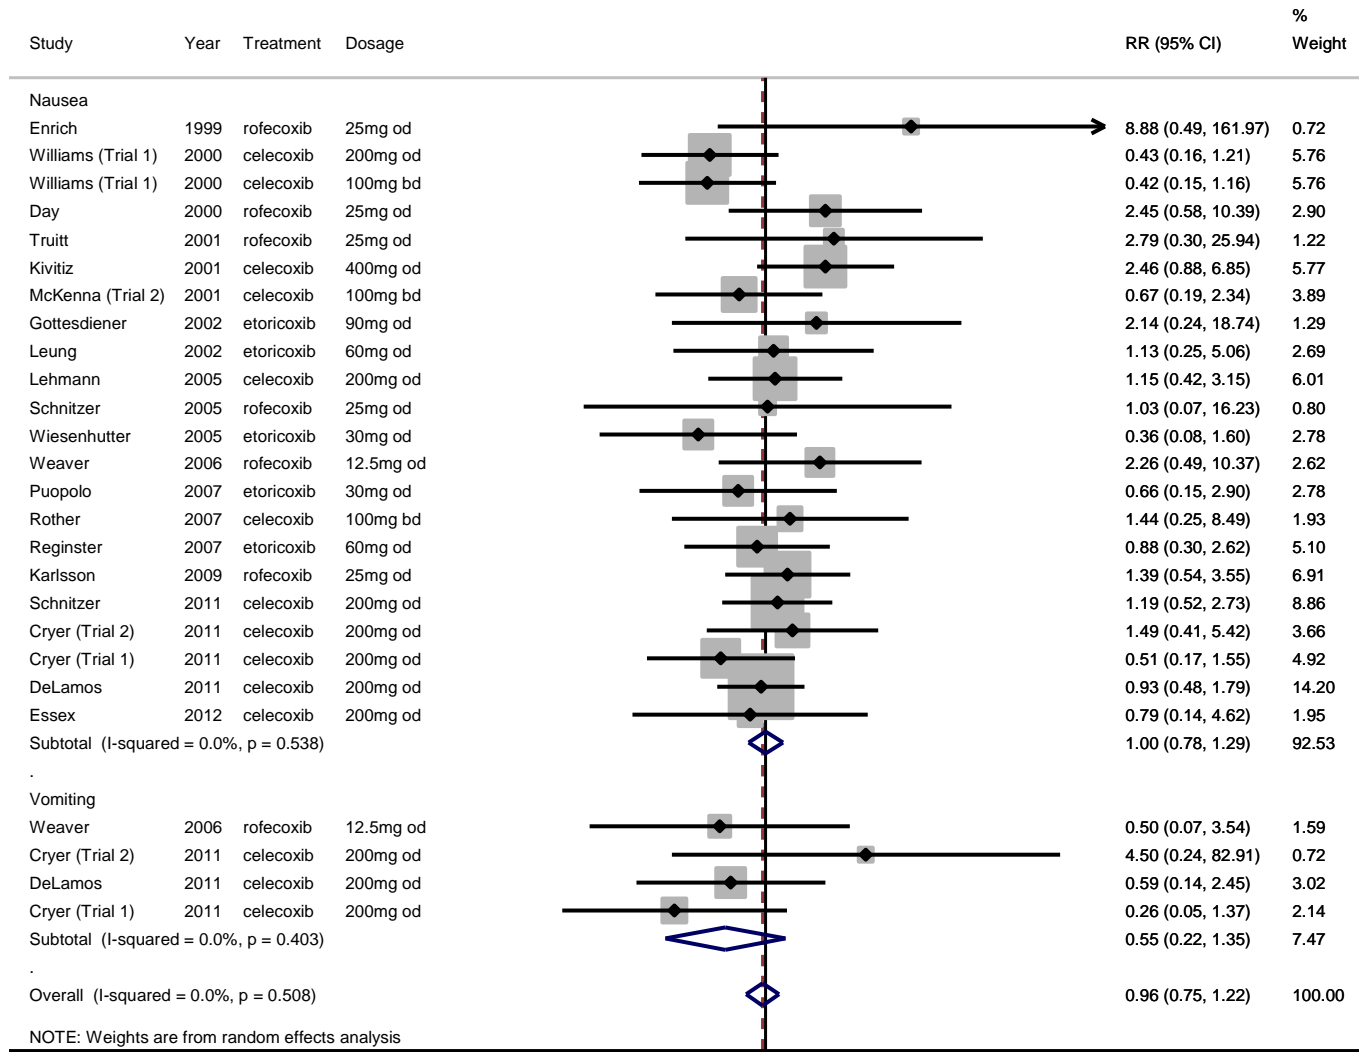

NOTE: Weights are from random effects analysis

0.006 1 162

Risk ratio  
Nausea or vomiting

**Figure 11** Relative risk (RR) of hypertension for COX-2 inhibitors (excluding rofecoxib) versus placebo

# Cox-2 inhibitors vs Placebo

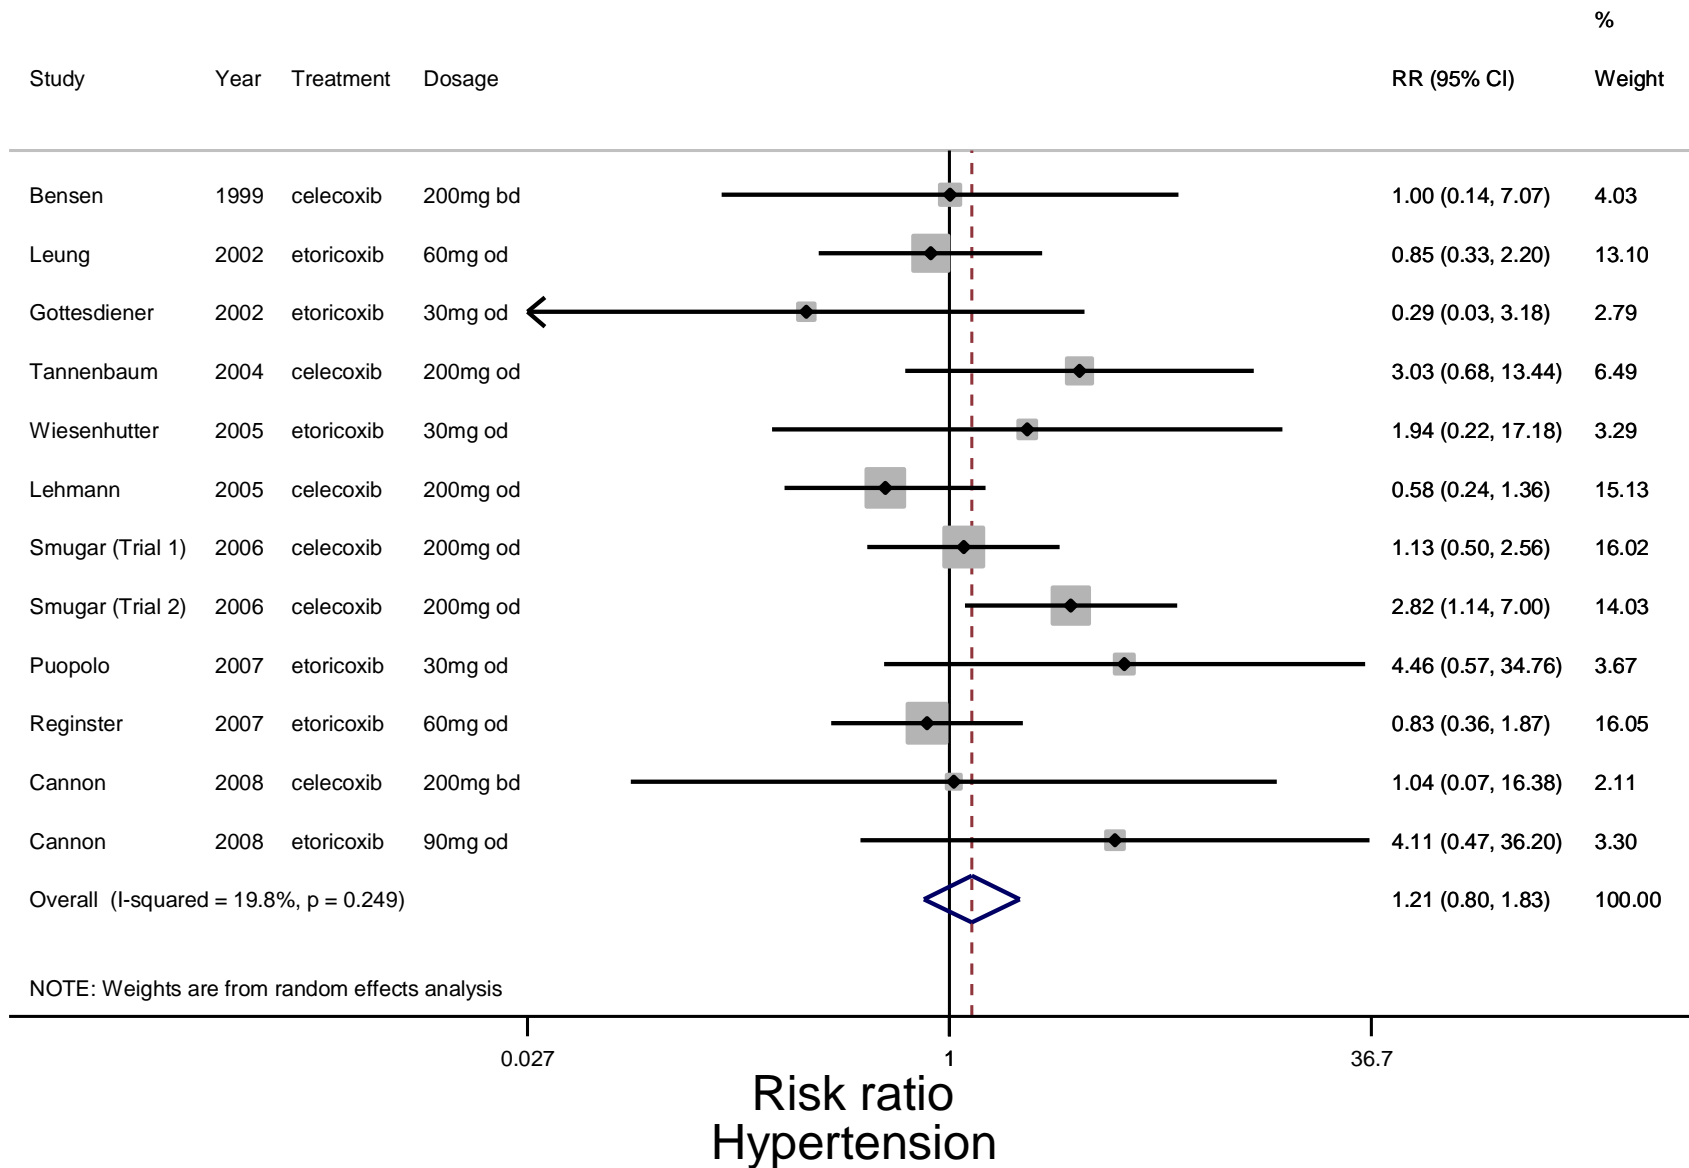

**Figure 12** Relative risk (RR) of central nervous system (CNS) adverse events for COX-2 inhibitors versus placebo

# Cox-2 inhibitors vs Placebo

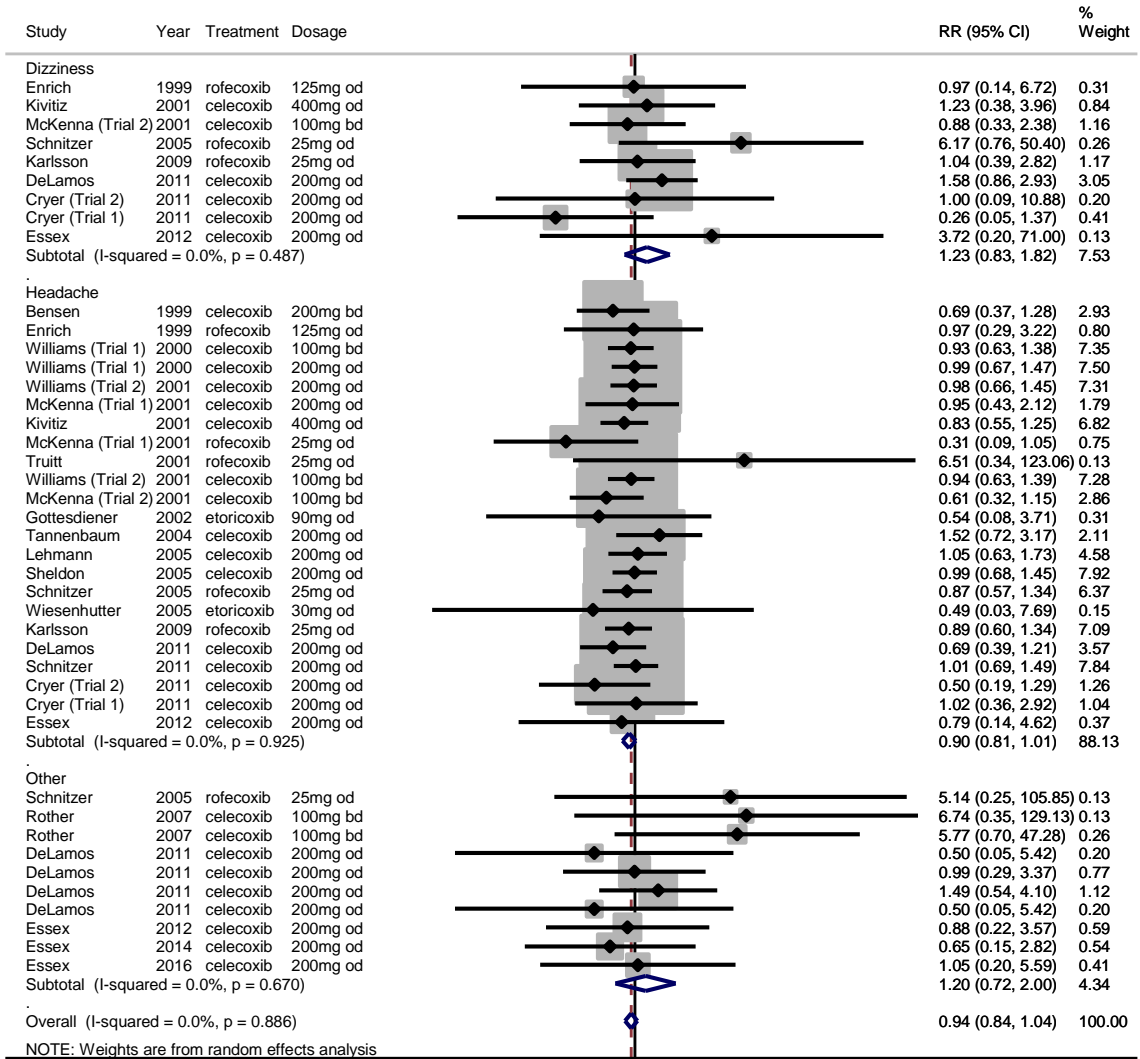

NOTE: Weights are from random effects analysis

0.008 1 129

Risk ratio  
CNS adverse events

**Figure 13** Relative risk (RR) of rash/pruritus for COX-2 inhibitors versus placebo

# Cox-2 inhibitors vs Placebo

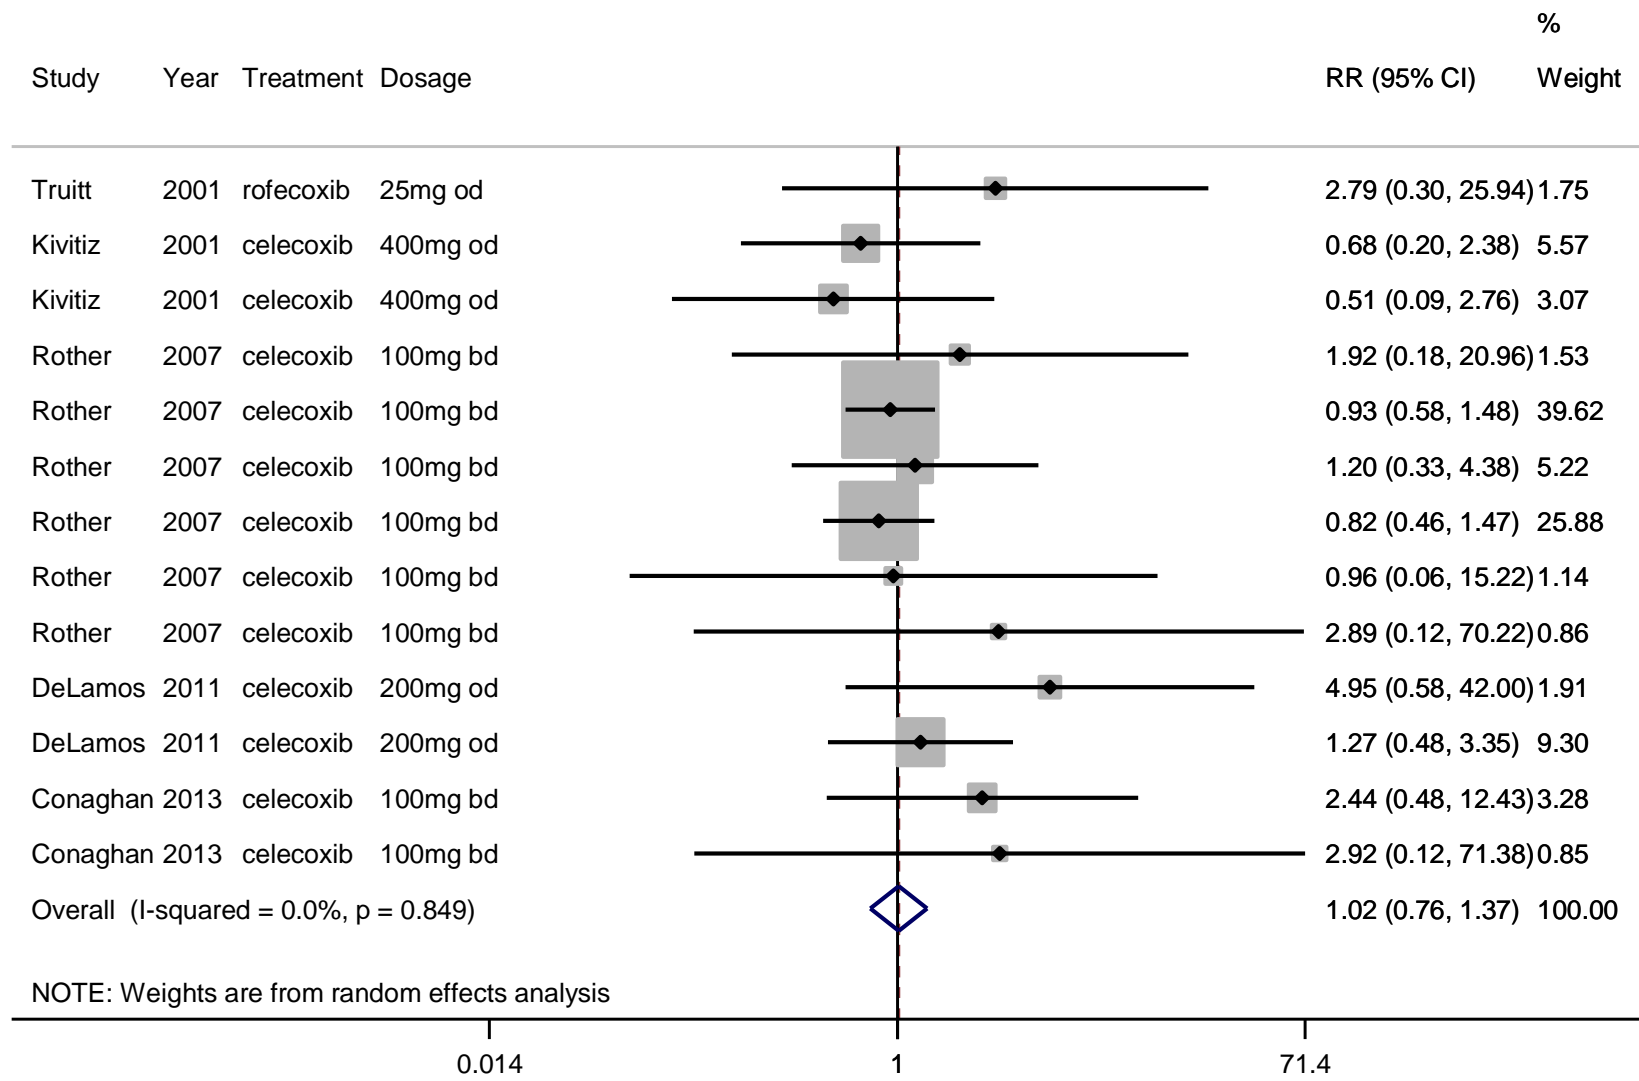

NOTE: Weights are from random effects analysis

Risk ratio  
Rash or pruritus

**Figure 14** Relative risk (RR) of serious adverse events for COX-2 inhibitors versus placebo

# Cox-2 inhibitors vs Placebo

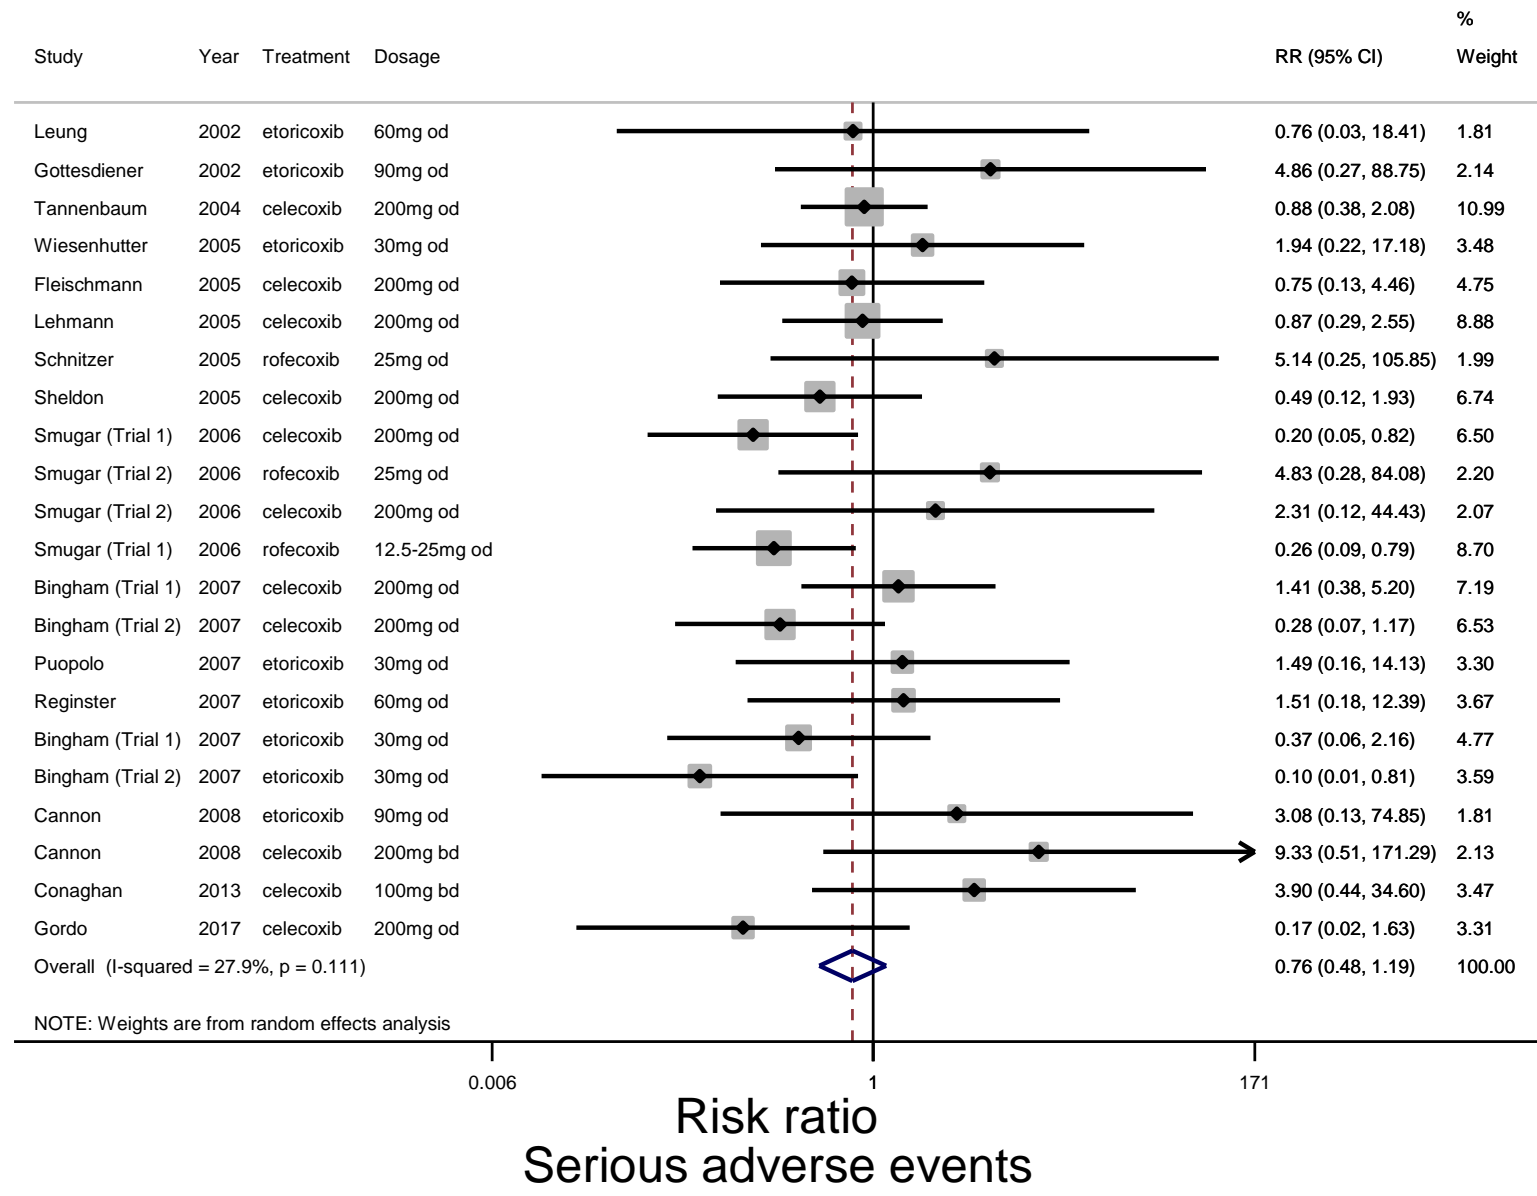

**Figure 15** Relative risk (RR) of total adverse events for COX-2 inhibitors versus placebo

# Cox-2 inhibitors vs Placebo

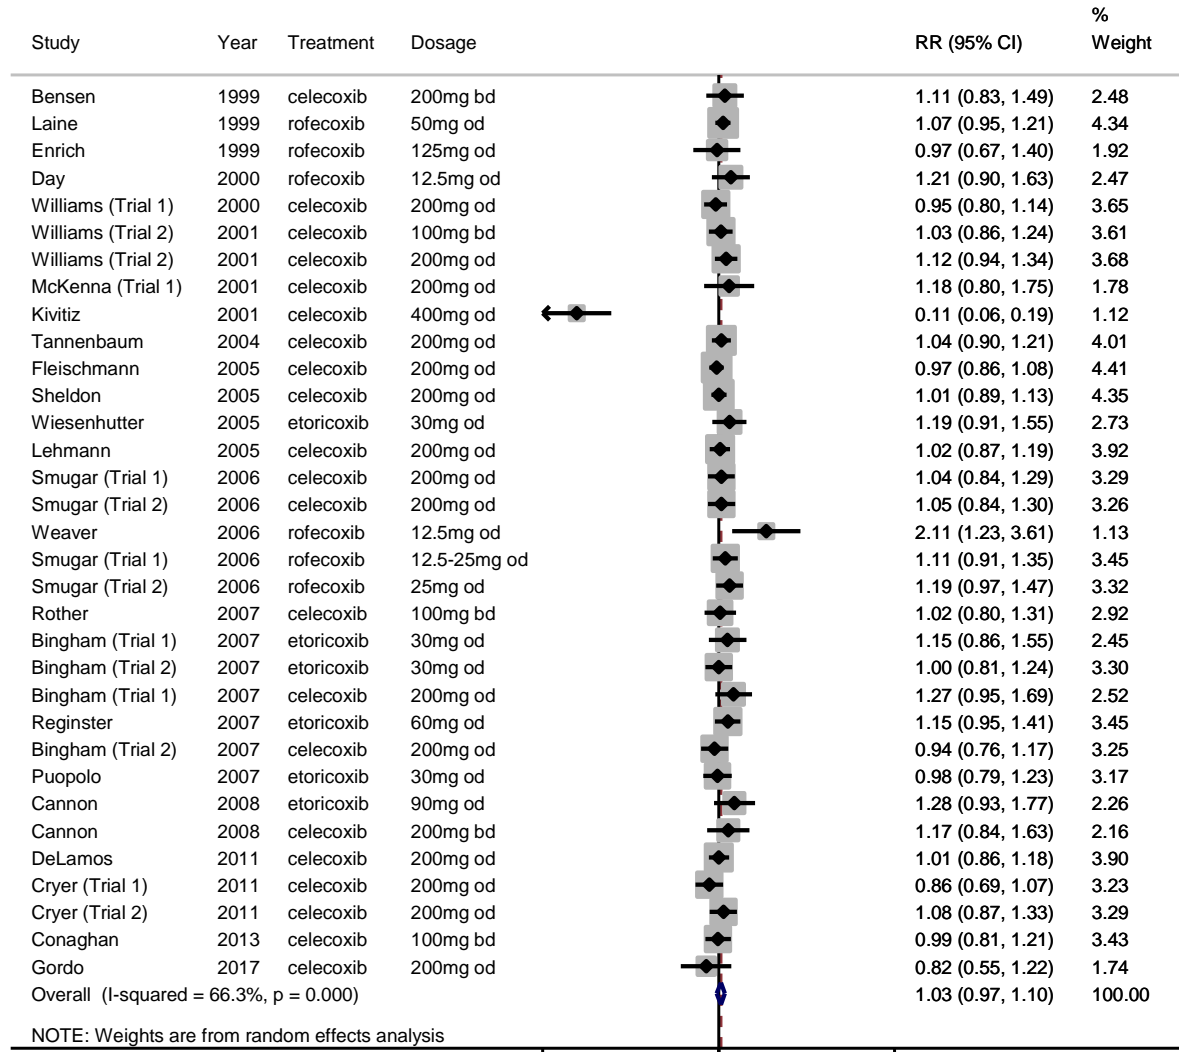

NOTE: Weights are from random effects analysis

Risk ratio  
Total adverse events
